# Supplementary material
Source: PubMed Central journal article supplement (PMC3437047)
Supplement: Supp_Fig1.pdf [file Supp_Fig1.pdf]

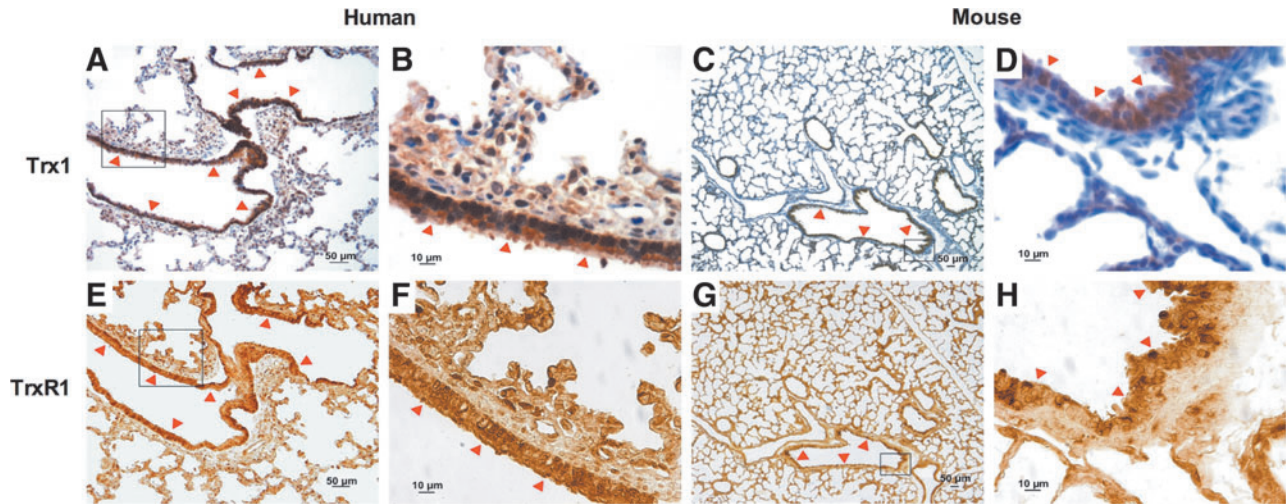

**SUPPLEMENTARY FIG. S1. Immunohistochemical analyses for Trx1 and TrxR1 in term newborn human and mouse lungs.** Lung sections were obtained from 1 day term newborn human and mouse lungs and were immunostained as described in Materials and Methods. Staining was more intense in ciliated and non-ciliated (Clara) airway epithelial cells (red arrows) in newborn human (A, B, E, F;  $n = 1$ ) and newborn murine (C, D,  $n = 4$ ; G, H,  $n = 1$ ) lungs than in alveolar epithelia. Note that differences in fixation/inflation between murine and human samples impact the preservation of lung cellular components. Trx1, thioredoxin-1; TrxR1, thioredoxin reductase-1.
