# Supplementary material
Source: PubMed Central journal article supplement (PMC3437047)
Supplement: Supp_Fig2.pdf [file Supp_Fig2.pdf]

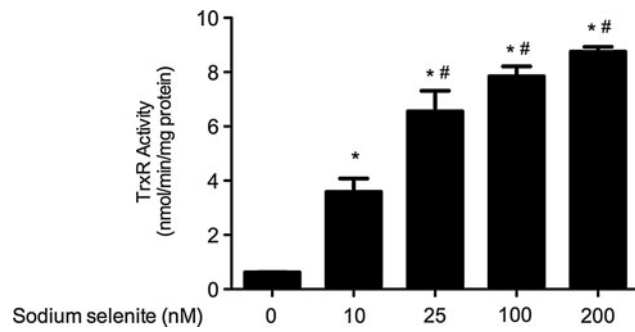

**SUPPLEMENTARY FIG. S2. TrxR1 activities in selenite-supplemented mtCC lysates.** mtCCs were cultured for 7 days in the presence of sodium selenite at the indicated concentrations. TrxR1 activities were determined by Trx1-dependent insulin-disulfide reductase assay. Data (mean  $\pm$  standard error of the mean,  $n=3$ ) were analyzed by one-way analysis of variance with significance noted at  $p<0.05$  (\*different than vehicle control; #different than 10 nM sodium selenite). mtCC, murine transformed Clara cells.
